# Supplementary material for: Schistosoma japonicum infection causes a reprogramming of glycolipid metabolism in the liver
Source: PubMed Central journal article supplement (PMC6679454; doi:10.1186/s13071-019-3621-6), 2019-08-02
Supplement: 13071_2019_3621_MOESM1_ESM.pdf [file 13071_2019_3621_MOESM1_ESM.pdf]

**Additional file 1: Table S1.** The primer sequences used in detecting the levels of mRNA

| <b>Gene name</b> | <b>Gene ID</b> | <b>Forward (5'—3')</b>   | <b>Reverse (5'—3')</b>  |
|------------------|----------------|--------------------------|-------------------------|
| Glut1            | 20525          | GCAGTTCGGCTATAACACTGG    | GCGGTGGTTCATGTTTGATTG   |
| Pdk1             | 228026         | GGATGTATAATCTATCAGCTCGT  | TTCCACAAGATCTCTAGCCTT   |
| Pkm2             | 18746          | GGAGCCACTCTGAAGATCACC    | ACTTCTCCATGTAAGCGTTGTCC |
| G6pc             | 14377          | CTACTCTTGCTATCTTTTCGAGGA | AACACCGGAATCCATACGTT    |
| Hk2              | 15277          | ATCTACGCCATTCCCGAGGACA   | ATCTCTGCCTTCCACGCCACT   |
| Pfkfb3           | 170768         | AAGAAGCTGACTCGCTACCTC    | AGTTGTACTCATTCTCGCCAT   |
| Aldoc            | 11676          | TACCGCCAGGTCTATTTCAGT    | CCCAGCTAGAGGCACTACACC   |
| Eno3             | 13808          | TCTCTACCGACACATCGCAGA    | GCTACATCCATGCCGATCACC   |
| Pfk              | 18641          | GAGCAGCCTCCATACCACA      | CTCGAGCTGGTAAACCCAC     |
| Ldha             | 16828          | ATGGCAACCCTCAAGGACCAG    | CATGCCAACAGCACCAACCC    |
| Scd1             | 20249          | CTCTACACCTGCCTCTTCGG     | GCCGTGCCTTGTAAGTTCTG    |
| Srebplc          | 20787          | CAGAGCCGTGGTGAGAAGC      | GCAAGAAGCGGATGTAGTCG    |
| Acc              | 107476         | CACCAGTTTTGCATTGAGAA     | TACGCTGTTGAGTTCATAGGCC  |
| Fas              | 14104          | AGGTGGTGATAGCCGGTATG     | TGGGTAATCCATAGAGCCCAGT  |
| PPARg            | 19016          | AGAACCTGCATCTCCACCTT     | CCCACAGACTCGGCACTCAATA  |
| Cpt1             | 12894          | GTGTCCAAGTATCTGGCAGT     | CAGGGTATTTCTCAAAGTCAAC  |
| CD36             | 20778          | TGGTCAAGCCAGCTAGAAA      | TCCCAAGTAAGGCCATCTC     |
| Acox1            | 11430          | ATGCCTTTGTTGCCCTATCCG    | CTGAGCTGCACTTCCCACGAG   |
| Atp5b            | 11947          | ATCAACAATGTCGCCAAAGCC    | ATTCAGCAACGGTCAAACCAG   |
| Ucp2             | 22228          | CCTCTGGATACCGCCAAGGTC    | TGACTCTCCCCTTGGATCTGC   |
| $\beta$ -actin   | 11461          | GTGACGTTGACATCCGTAAAGA   | GCCGGACTCATCGTACTCC     |
