# Supplementary material for: Schistosoma japonicum infection causes a reprogramming of glycolipid metabolism in the liver
Source: PubMed Central journal article supplement (PMC6679454; doi:10.1186/s13071-019-3621-6), 2019-08-02
Supplement: 13071_2019_3621_MOESM2_ESM.pdf [file 13071_2019_3621_MOESM2_ESM.pdf]

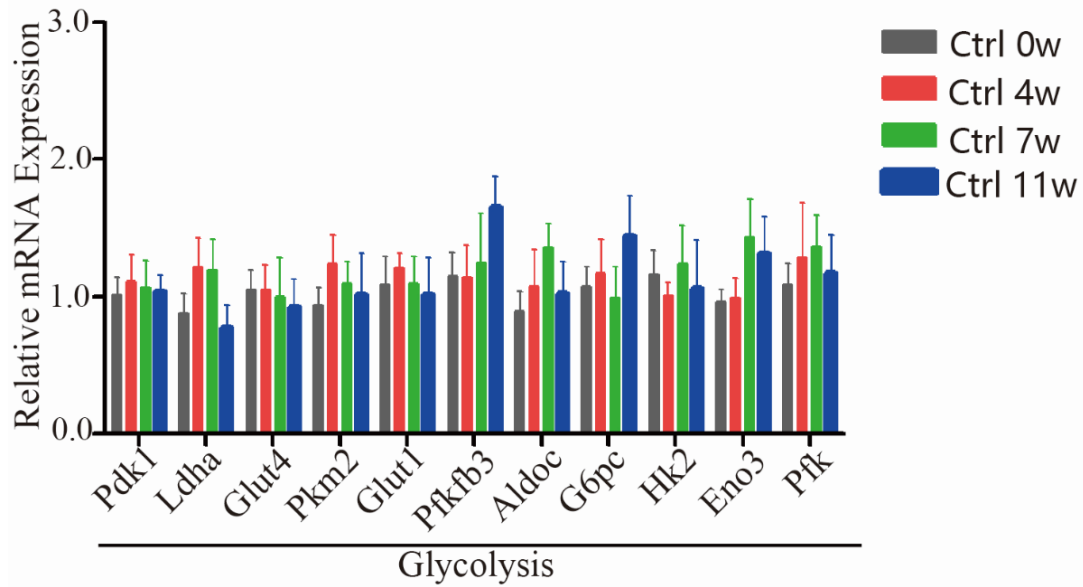

**Additional file 2: Fig. S1. Dynamic of the expression of genes associated with hepatic glucose metabolism in control mice**

Liver tissues were prepared from control mice at the time points (0, 4, 7, and 11 weeks post-infection). The mRNA levels of glycolysis-related important genes (Pdk1, Ldha, Glut4, Pkm2, Glut1, Pfkfb3, Aldoc, HK2, Eno3, Pfk) and gluconeogenesis gene (G6pc) in the liver of each group were evaluated by real-time PCR. The mRNA level of each gene was normalized to  $\beta$ -actin mRNA levels in each sample (ANOVA/LSD).
