# Supplementary material for: Schistosoma japonicum infection causes a reprogramming of glycolipid metabolism in the liver
Source: PubMed Central journal article supplement (PMC6679454; doi:10.1186/s13071-019-3621-6), 2019-08-02
Supplement: 13071_2019_3621_MOESM3_ESM.pdf [file 13071_2019_3621_MOESM3_ESM.pdf]

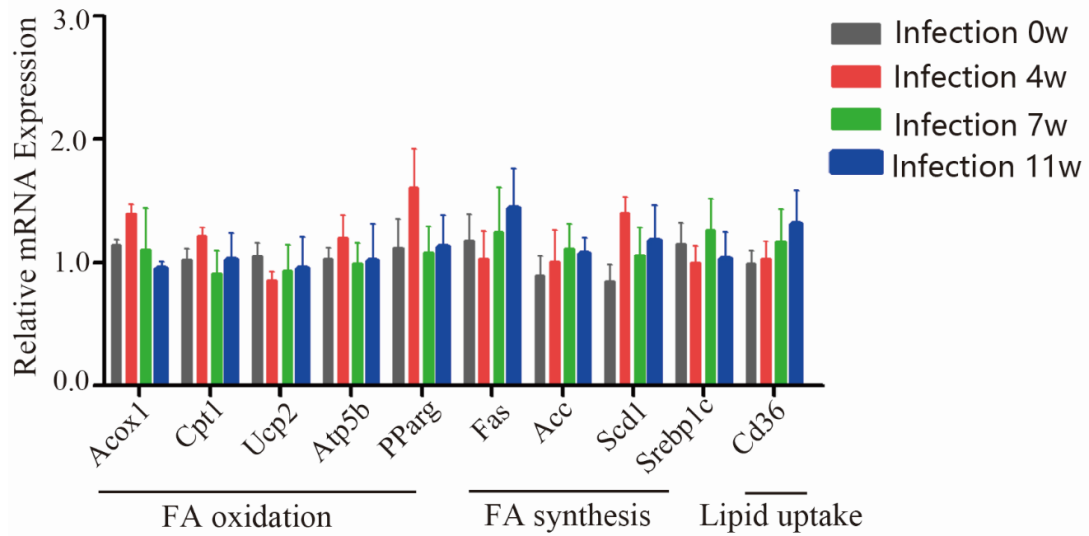

**Additional file 3: Fig. S2. Dynamic of the expression of genes associated with hepatic lipid metabolism in control mice**

Liver tissues were prepared from control mice at the time points (0, 4, 7, and 11 weeks post-infection). Expression of fatty acid (FA) oxidative-related genes (Acox1, Cpt1, Ucp2, Atp5b, Pparg), the FA synthesis genes (Fas, Acc, Scd1, Srebp1c) and lipid uptake gene (CD36) in the liver was evaluated by real-time PCR. The mRNA level of each gene was normalized to  $\beta$ -actin mRNA levels in each sample (ANOVA/LSD).
