# Supplementary material for: Schistosoma japonicum infection causes a reprogramming of glycolipid metabolism in the liver
Source: PubMed Central journal article supplement (PMC6679454; doi:10.1186/s13071-019-3621-6), 2019-08-02
Supplement: 13071_2019_3621_MOESM4_ESM.pdf [file 13071_2019_3621_MOESM4_ESM.pdf]

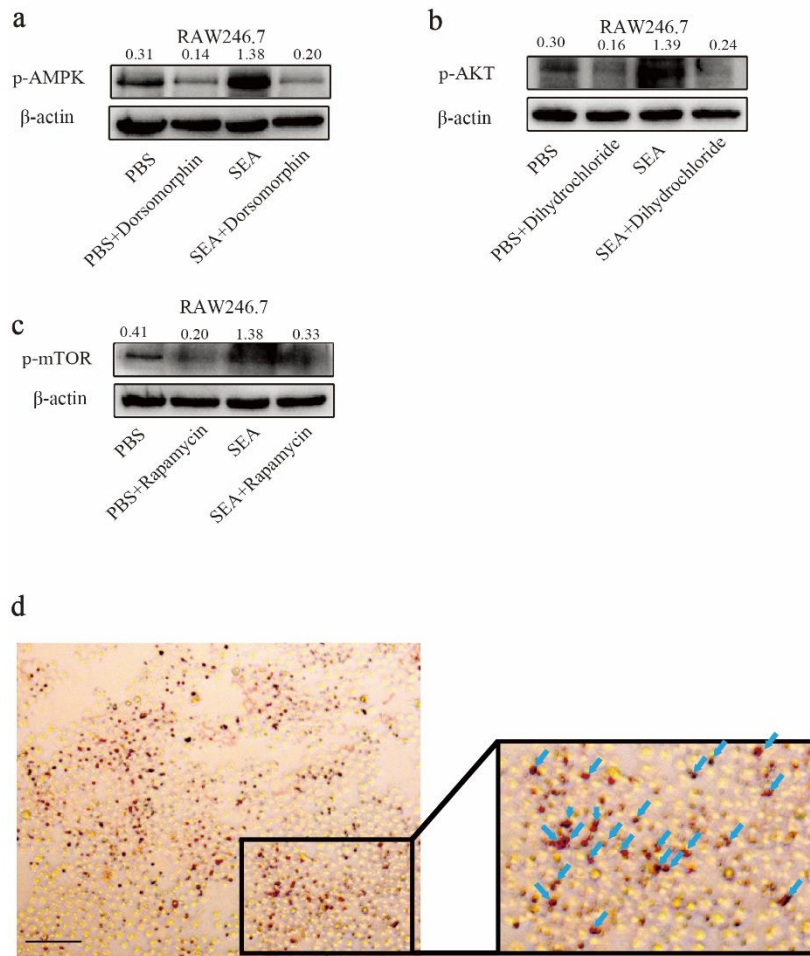

**Additional file 4: Fig. S3. The effects of inhibitors to pho-AMPK, pho-AKT, and pho-mTOR expression in macrophages**

Representative Western blots of pho-AMPK, pho-AKT, pho-mTOR in RAW264.7 cells (**a-c**) that were treated with SEA (20  $\mu\text{g/ml}$ ) with or without phosphorylated AMPK inhibitor (Dorsomorphin), phosphorylated AKT inhibitor (Dihydrochloride), and phosphorylated mTOR inhibitor (Rapamycin) for 24 h. Band density was measured by ImageJ software and normalized to  $\beta$ -actin. (**d**) The representative figure related Figure 4c for the oil red O staining of FL83B and RAW264.7 cells that were treated with SEA (20  $\mu\text{g/ml}$ ) with or without phosphorylated AMPK inhibitor (Dorsomorphin), phosphorylated AKT inhibitor (Dihydrochloride), and phosphorylated mTOR inhibitor (Rapamycin) for 24 h.
